# Supplementary material
Source: publisher figshare collection journal article supplement (https://tandf.figshare.com/ndownloader/files/17937917)
Supplement: Supplementary file 1 [file 17937917]

**Synthesis of functionalized selenazole derivatives via a three-component condensation of ethyl-2-chloro-3-oxo-butyrate, potassium selenocyanate and hydrazine or hydrazidederivatives
Marziyeh Pourmosavia, Mohammad H. Mosslemina*and Alireza Hassanabadi b**

aDepartment of Chemistry, Yazd Branch, Islamic Azad University, Yazd, Iran

bDepartment of Chemistry, Zahedan Branch, Islamic Azad University, Zahedan, Iran

Email: mhmosslemin@gmail.com


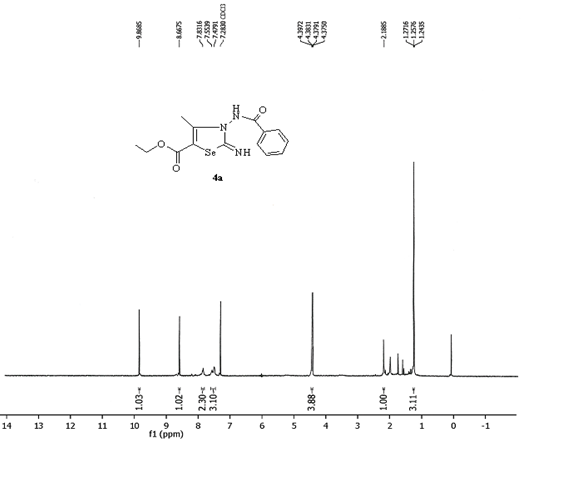


**Figure S 1**: 1H NMR of 4a

**
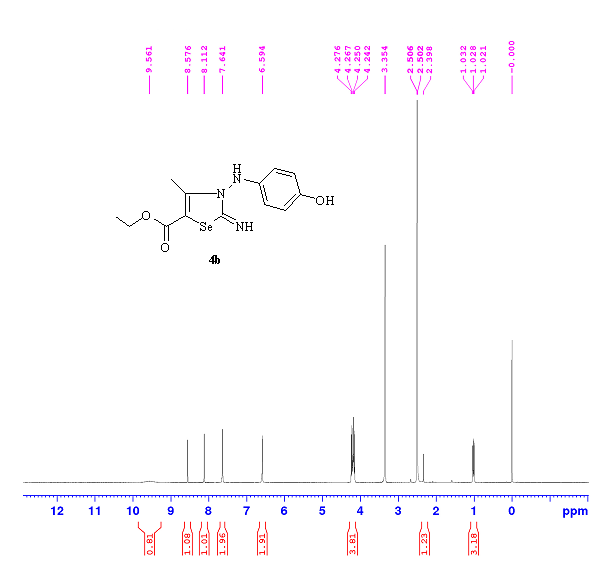
**

**Figure S 2**: 1H NMR of 4b


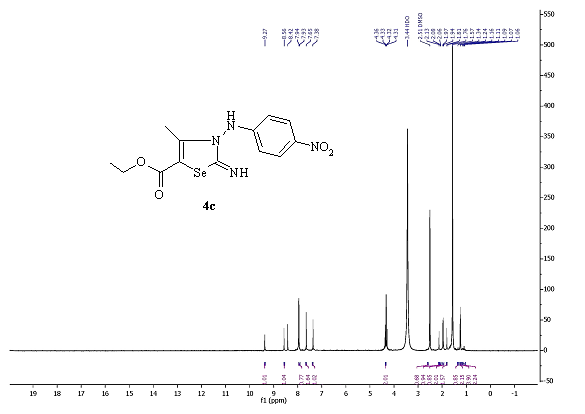


**Figure S 3**: 1H NMR of 4c


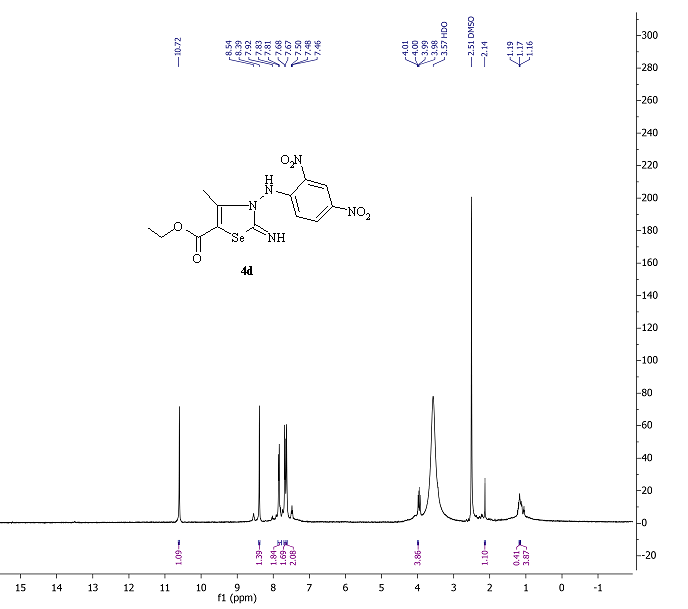


**Figure S 4**: 1H NMR of 4d


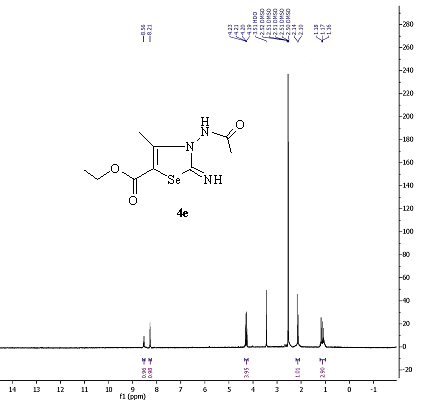


**Figure S 5**: 1H NMR of 4e


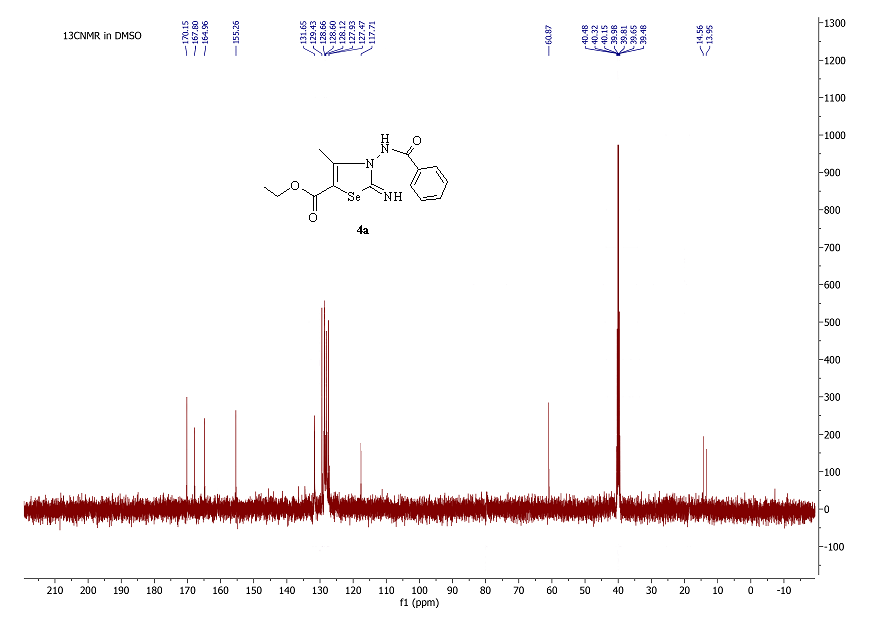


**Figure S 6**: 13C NMR of 4a


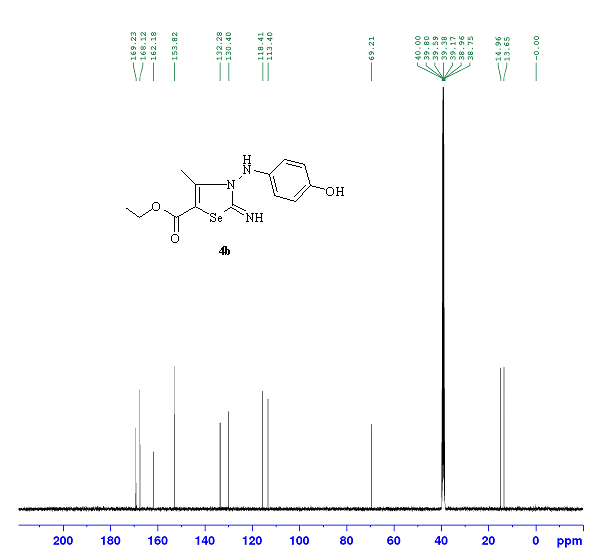


**Figure S 7**: 13C NMR of 4b


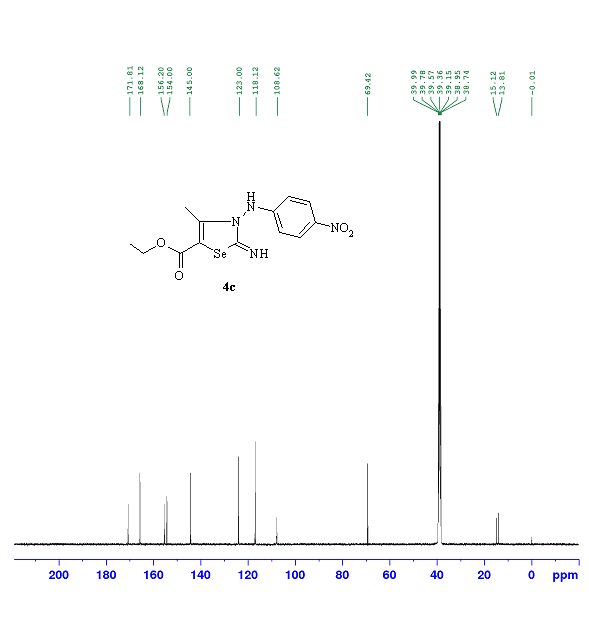


**Figure S 8**: 13C NMR of 4c


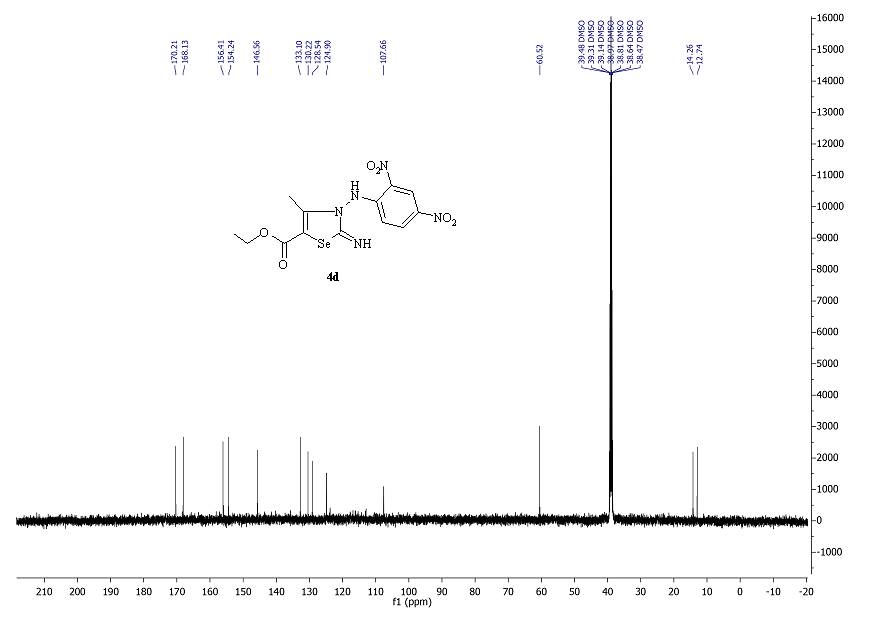


**Figure S 9**: 13C NMR of 4d


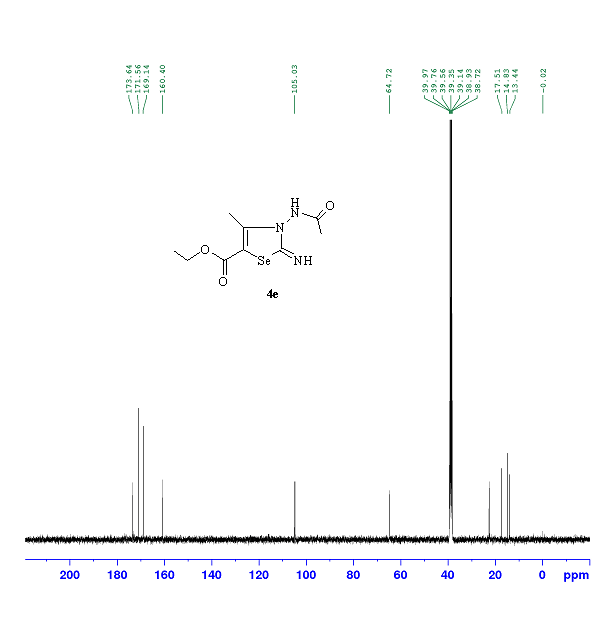


**Figure S 10**: 13C NMR of 4e
